# Supplementary material for: Environmental and Behavioral Factors in Association with Lung Function Impairment in Children Living in Wuhan, China
Source: Int J Environ Res Public Health. 2023 Jan 9;20(2):1134. doi: 10.3390/ijerph20021134 (PMC9858857; doi:10.3390/ijerph20021134)
Supplement: Supplementary file 1 [file ijerph-20-01134-s001.zip › ijerph-2107635-supplementary.pdf]

**Table S1.** Anthropometry, sociodemographic, household and parental information and children's behavior patterns by residence location (urban versus suburban).

| Category                  | Variables                                      | Total (n=383) | Living in urban (n=243) | Living in suburban (n=140) | P-value |
|---------------------------|------------------------------------------------|---------------|-------------------------|----------------------------|---------|
| Anthropometry             | Age, years                                     | 9.4±1.2       | 9.5±1.5                 | 9.3±0.6                    | <0.001  |
|                           | Male, n (%)                                    | 219 (57.2%)   | 139 (57.2%)             | 80 (57.1%)                 | 0.947   |
|                           | Height, cm                                     | 140.6±9.5     | 142.1±10.9              | 137.9±5.5                  | <0.001  |
|                           | Weight, kg                                     | 34.9±9.7      | 36.4±11.0               | 32.5±6.4                   | <0.001  |
|                           | BMI status                                     |               |                         |                            | 0.014   |
|                           | Normal                                         | 283 (74.1%)   | 168 (69.1%)             | 115 (82.7%)                |         |
|                           | Over weight                                    | 53 (13.9%)    | 40 (16.5%)              | 13 (9.4%)                  |         |
|                           | Obese                                          | 46 (12.0%)    | 35 (14.4%)              | 11 (7.9%)                  |         |
|                           | BMI (kg/m <sup>2</sup> )                       | 17.4±3.1      | 17.7±3.4                | 17.0±2.4                   | <0.01   |
|                           | Height stunting, n (%)                         | 4 (1.0%)      | 2 (0.8%)                | 2 (1.4%)                   | 0.564   |
|                           | Breast feeding, n (%)                          | 292 (81.1%)   | 180 (75.9%)             | 112 (91.1%)                | <0.001  |
|                           | Preterm birth, n (%)                           | 33 (8.6%)     | 26 (10.9%)              | 7 (5.4%)                   | 0.081   |
| Personal activity pattern | Active in physical exercise, n (%)             | 271 (73.2%)   | 185 (79.1%)             | 86 (63.2%)                 | <0.001  |
|                           | ETS exposure, n (%)                            | 318 (83.0%)   | 209 (86.0%)             | 108 (77.7%)                | 0.038   |
|                           | Vegetables consumption, n (%)                  |               |                         |                            | 0.047   |
|                           | 0-3 times/month                                | 5 (1.3%)      | 1 (0.4%)                | 4 (2.9%)                   |         |
|                           | 1-6 times/week                                 | 41 (11.1%)    | 22 (9.4 %)              | 19 (14.0%)                 |         |
|                           | 1-3times/day                                   | 325 (87.6%)   | 211 (90.2)              | 113 (83.1%)                |         |
|                           | Fruit consumption, n (%)                       |               |                         |                            | 0.285   |
|                           | 0-3 times/ month                               | 13 (3.5%)     | 6 (2.6%)                | 7 (5.1%)                   |         |
|                           | 1-6 times/week                                 | 59 (15.9%)    | 34 (14.5%)              | 24 (17.6%)                 |         |
|                           | 1-3times/day                                   | 299 (80.6%)   | 194 (82.9%)             | 105 (77.2%)                |         |
|                           | Dairy consumption, n (%)                       |               |                         |                            | 0.007   |
|                           | 0-3 times/ month                               | 18 (4.9%)     | 7 (3.0%)                | 11 (8.1%)                  |         |
|                           | 1-6 times/week                                 | 48 (12.9%)    | 24 (10.3%)              | 24 (17.6%)                 |         |
|                           | 1-3times/day                                   | 305 (82.2%)   | 203 (86.8%)             | 101 (74.3%)                |         |
|                           | Seafood consumption, n (%)                     |               |                         |                            | 0.001   |
|                           | 0-3 times/ month                               | 124 (33.4%)   | 70 (29.9%)              | 54 (39.7%)                 |         |
|                           | 1-6 times/week                                 | 201 (54.2%)   | 143 (61.1%)             | 58 (42.6%)                 |         |
|                           | 1-3times/day                                   | 46 (12.4%)    | 21 (9.0%)               | 24 (17.6%)                 |         |
|                           | High-calorie food consumption, n (%)           |               |                         |                            | 0.878   |
|                           | 0-3 times/ month                               | 259 (69.8%)   | 163 (69.7%)             | 95 (69.9%)                 |         |
|                           | 1-6 times/week                                 | 103 (27.8%)   | 66 (28.2%)              | 37 (27.2%)                 |         |
|                           | 1-3times/day                                   | 9 (2.4%)      | 5 (2.1%)                | 4 (2.9%)                   |         |
| Parental factors          | Air pollution exposure during commuting, n (%) | 295 (77.0%)   | 181 (74.5%)             | 114 (82.0%)                | 0.042   |
|                           | Paternal smoking, n (%)                        | 173 (47.4%)   | 119 (51.3%)             | 54 (40.9%)                 | 0.147   |
|                           | Maternal smoking, n (%)                        | 0 (0)         | 0 (0)                   | 0 (0)                      | /       |
|                           | Paternal asthma, n (%)                         | 1 (0.3%)      | 0 (0)                   | 1 (0.8%)                   | 0.172   |
|                           | Maternal asthma, n (%)                         | 0 (0)         | 0 (0)                   | 0 (0)                      | /       |
|                           | Paternal bronchitis, n (%)                     | 19 (5.2%)     | 14 (5.9%)               | 5 (4.0%)                   | 0.435   |
|                           | Maternal bronchitis, n (%)                     | 22 (6.1%)     | 13 (5.4%)               | 9 (7.3%)                   | 0.491   |
| Household factors         | Household coal use, n (%)                      | 11 (2.9%)     | 4 (1.6%)                | 7 (5.0%)                   | 0.057   |
|                           | Ventilation use when cooking, n (%)            | 345 (98.9%)   | 223 (99.1%)             | 122 (98.4%)                | 0.543   |
|                           | Enclosed kitchen, n (%)                        | 249 (67.7%)   | 171 (72.5%)             | 78 (59.1%)                 | 0.009   |
|                           | Home renovation, n (%)                         | 71 (19.0%)    | 46 (19.1%)              | 25 (18.8%)                 | 0.945   |
|                           | Presence of pets, n (%)                        | 63 (16.7%)    | 39 (16.1%)              | 24 (17.8%)                 | 0.678   |
|                           | Presence of mold, n (%)                        | 43 (11.3%)    | 28 (11.5%)              | 15 (11.0%)                 | 0.885   |
|                           | Mosquito coil use, n (%)                       | 262 (69.5%)   | 154 (63.9%)             | 108 (79.4%)                | 0.002   |

|                      |                                                    |             |             |            |                  |
|----------------------|----------------------------------------------------|-------------|-------------|------------|------------------|
|                      | Air fresheners use, n (%)                          | 56 (14.9%)  | 32 (13.3%)  | 24 (17.6%) | 0.252            |
|                      | Air purifier use, n (%)                            | 79 (21.0%)  | 60 (24.9%)  | 19 (14.1%) | <b>0.013</b>     |
|                      | Time of window opening in spring <sup>3</sup>      | 14.7±7.7    | 14.9±7.8    | 14.1±7.3   | 0.375            |
|                      | Time of window opening in summer <sup>3</sup>      | 14.3±7.4    | 13.7±7.4    | 15.4±7.3   | <b>0.047</b>     |
|                      | Time of window opening in autumn <sup>3</sup>      | 13.9±7.8    | 14.2±7.8    | 13.3±7.8   | 0.318            |
|                      | Time of window opening in winter <sup>3</sup>      | 9.2±8.0     | 9.2±7.1     | 9.3±9.8    | 0.959            |
|                      | Time of air conditioner use in spring <sup>3</sup> | 0.7±2.4     | 0.9±2.8     | 0.3±1.4    | <b>0.022</b>     |
|                      | Time of air conditioner use in summer <sup>3</sup> | 8.6±5.0     | 9.1±4.8     | 7.3±5.1    | <b>0.002</b>     |
|                      | Time of air conditioner use in autumn <sup>3</sup> | 0.6±2.2     | 0.6±2.4     | 0.4±1.8    | 0.080            |
|                      | Time of air conditioner use in winter <sup>3</sup> | 2.1±3.8     | 2.4±3.9     | 1.3±3.7    | <b>0.015</b>     |
| Socioeconomic factor | Sleep in own room, n (%)                           | 241 (64.8%) | 169 (70.7%) | 72 (54.1%) | <b>0.001</b>     |
|                      | Sleep in own bed, n (%)                            | 288 (77.2%) | 199 (83.3%) | 89 (66.4%) | <b>&lt;0.001</b> |
|                      | Paternal occupation                                |             |             |            | <b>&lt;0.001</b> |
|                      | Blue collar <sup>1</sup>                           | 127 (35.9%) | 64 (26.9%)  | 63 (54.3%) |                  |
|                      | White collar <sup>2</sup>                          | 156 (44.1%) | 112 (47.1%) | 44 (37.9%) |                  |
|                      | Others                                             | 71 (20.1%)  | 62 (26.1%)  | 9 (7.8%)   |                  |
|                      | Maternal occupation                                |             |             |            | <b>&lt;0.001</b> |
|                      | Blue collar <sup>1</sup>                           | 90 (26.1%)  | 36 (15.3%)  | 54 (49.5%) |                  |
|                      | White collar <sup>2</sup>                          | 193 (55.9%) | 146 (61.9%) | 47 (43.1%) |                  |
|                      | Others                                             | 62 (18.0%)  | 54 (22.9%)  | 8 (7.3%)   |                  |
|                      | Paternal education level                           |             |             |            | <b>&lt;0.001</b> |
|                      | ≥College, n (%)                                    | 133 (36.0%) | 116 (48.3%) | 17 (13.2%) |                  |
|                      | Maternal education level                           |             |             |            | <b>&lt;0.001</b> |
|                      | ≥ College, n (%)                                   | 120 (32.4%) | 110 (45.6%) | 10 (7.8%)  |                  |

Values are mean (SD) or number (percentage %).

<sup>1</sup> “White collar” includes teacher, businessperson, clerk, housewife (few cases), and other non-manual laborer occupations.

<sup>2</sup> “Blue collar” refers to factory worker, construction worker, building cleaning worker, farmer, and other manual laborer occupations.

<sup>3</sup> The time is counted in min/day

**Table S2.** Prevalence of reduced lung function in children with different gender and areas, and the odds ratios (OR) and 95% confidence interval (95% CI) of the prevalence of reduced lung function in children in male versus female

| Index                  | Prevalence, N(%) |            |            |       | Odd ratios (95% CI) and P value |       |
|------------------------|------------------|------------|------------|-------|---------------------------------|-------|
|                        | Total            | Male       | Female     | P     | OR (95% CI) <sup>1</sup>        | P     |
| FET                    | 381 (99.5%)      | 218(99.5%) | 162(99.4%) | 0.834 | /                               | /     |
| FEV <sub>6</sub>       | 179 (46.7%)      | 98(44.7%)  | 81(49.7%)  | 0.338 | 1.086 (0.583, 2.022)            | 0.796 |
| FEV <sub>3</sub>       | 133 (34.7%)      | 71(32.4%)  | 62(38.0%)  | 0.254 | 1.162 (0.602, 2.244)            | 0.655 |
| FEF <sub>25</sub>      | 231 (60.3%)      | 125(57.1%) | 106(65.0%) | 0.116 | 0.818 (0.432, 1.551)            | 0.539 |
| FEF <sub>50</sub>      | 187 (48.8%)      | 99(45.2%)  | 88(54.0%)  | 0.089 | 0.741 (0.404, 1.360)            | 0.334 |
| FIVC                   | 315 (82.2%)      | 181(82.6%) | 134(82.2%) | 0.911 | 1.273 (0.571, 2.840)            | 0.555 |
| FIV <sub>1</sub>       | 291 (76.0%)      | 169(77.2%) | 122(74.8%) | 0.598 | 1.995 (0.914, 4.183)            | 0.084 |
| FIV <sub>1</sub> /FIVC | 105 (27.4%)      | 60(27.4%)  | 45(27.6%)  | 0.964 | 1.019 (0.507, 2.045)            | 0.959 |
| FEV <sub>1</sub> /VC   | 104 (27.2%)      | 60(27.4%)  | 44(27.0%)  | 0.93  | 0.786 (0.387, 1.596)            | 0.505 |
| FEV <sub>3</sub> /FVC  | 2 (0.5%)         | 0(0)       | 2(1.2%)    | 0.1   | /                               | /     |
| EVC                    | 141 (36.8%)      | 85(38.8%)  | 56(34.4%)  | 0.372 | 1.224 (0.639, 2.342)            | 0.542 |
| IC                     | 108 (28.2%)      | 67(30.6%)  | 41(25.2%)  | 0.243 | 1.344 (0.692, 2.603)            | 0.381 |
| VC                     | 113 (29.5%)      | 67(30.6%)  | 46(28.2%)  | 0.615 | 0.983 (0.502, 1.926)            | 0.960 |
| ERV                    | 289 (75.5%)      | 169(77.2%) | 119(73.0%) | 0.35  | 1.651 (0.784, 3.475)            | 0.187 |
| MVV                    | 365 (95.3%)      | 207(94.5%) | 157(96.3%) | 0.412 | 1.017 (0.117, 8,836)            | 0.988 |

/, no data

<sup>1</sup>, Adjusted for gender, age, height, premature birth, parental education level, parental occupation, father smoking, other smoking, sleeping in own room, sleeping in own bed, household coal use, ventilation use when cooking, breast feeding, window opening and air condition use in different seasons, home renovation, presence of pets, presence of mold, mosquito coin use, air freshener use, air purifier use, kitchen type, parental bronchitis, intake of fruit, dairy, seafood and high-calorie food, doing physical exercise, ETS exposure and air exposure during commuting

**Table S3.** Lung function and the prevalence of impaired lung function in children with different BMI status, bold numbers were statistically significant

|                                                    | Normal (N=283) | Overweight (N=53) | Obesity (N=47) | Overall (N=383) | <i>p</i> -value |
|----------------------------------------------------|----------------|-------------------|----------------|-----------------|-----------------|
| <i>Lung function levels, Mean (SD)</i>             |                |                   |                |                 |                 |
| FET, sec                                           | 1.22(0.51)     | 1.39 (0.72)       | 1.36 (0.59)    | 1.26 (0.55)     | 0.045           |
| FEV <sub>6</sub> , L                               | 1.74 (0.42)    | 1.99 (0.42)       | 2.18 (0.93)    | 1.83 (0.53)     | <b>0.000</b>    |
| FEV <sub>3</sub> , L                               | 1.73 (0.43)    | 1.98 (0.42)       | 2.18 (0.93)    | 1.82 (0.52)     | <b>0.000</b>    |
| FEF <sub>25</sub> , L/sec                          | 3.06 (0.89)    | 3.46 (0.98)       | 3.60 (0.94)    | 3.18 (0.93)     | <b>0.000</b>    |
| FEF <sub>50</sub> , L/sec                          | 2.42 (0.70)    | 2.67 (0.71)       | 2.73 (0.78)    | 2.49 (0.72)     | <b>0.004</b>    |
| FIVC, L                                            | 1.26 (0.55)    | 1.38 (0.67)       | 1.57 (0.66)    | 1.31 (0.59)     | <b>0.002</b>    |
| FIV <sub>1</sub> , L                               | 1.17 (0.52)    | 1.26 (0.61)       | 1.46 (0.59)    | 1.22 (0.55)     | <b>0.003</b>    |
| FIV <sub>1</sub> /FIVC, %                          | 79.32 (27.65)  | 76.39 (31.53)     | 83.81 (26.98)  | 79.50 (28.11)   | 0.421           |
| FEV <sub>1</sub> /VC, %                            | 83.53 (21.48)  | 82.32 (20.86)     | 79.84 (20.21)  | 82.91 (21.20)   | 0.538           |
| FEV <sub>3</sub> /FVC, %                           | 99.57 (4.33)   | 100.00 (0.00)     | 100.00 (0.00)  | 99.68 (3.72)    | 0.611           |
| EVC, L                                             | 1.75 (1.16)    | 2.19 (1.21)       | 2.12 (1.51)    | 1.86 (1.22)     | <b>0.015</b>    |
| IC, L                                              | 1.44 (0.84)    | 1.68 (0.88)       | 1.75 (1.13)    | 1.51 (0.89)     | <b>0.025</b>    |
| VC, L                                              | 2.07 (0.83)    | 2.39 (0.99)       | 2.47 (1.19)    | 2.17 (0.91)     | <b>0.004</b>    |
| ERV, L                                             | 0.39 (0.42)    | 0.50 (0.50)       | 0.40 (0.49)    | 0.40 (0.44)     | 0.193           |
| MVV, L/min                                         | 39.44 (13.12)  | 42.62 (14.65)     | 48.67 (14.49)  | 41.04 (13.82)   | <b>0.000</b>    |
| <i>Prevalence of impaired lung function, N (%)</i> |                |                   |                |                 |                 |
| FET                                                | 282 (74.2 %)   | 52 (13.7 %)       | 46 (12.1 %)    | 381 (99.5%)     | <b>0.000</b>    |
| FEV <sub>6</sub>                                   | 148 (82.7 %)   | 13 (7.3 %)        | 18 (10.1 %)    | 179 (46.7%)     | 0.201           |
| FEV <sub>3</sub>                                   | 109 (82.0 %)   | 13 (9.8 %)        | 11 (8.3 %)     | 133 (34.7%)     | <b>0.000</b>    |
| FEF <sub>25</sub>                                  | 183 (79.2%)    | 23 (10.0 %)       | 25 (10.8 %)    | 231 (60.3%)     | <b>0.000</b>    |
| FEF <sub>50</sub>                                  | 144 (77.0 %)   | 20 (10.7 %)       | 23 (12.3 %)    | 187 (48.8%)     | 0.646           |
| FIVC                                               | 237 (75.2 %)   | 41 (13.0 %)       | 37 (11.7 %)    | 315 (82.2%)     | <b>0.000</b>    |
| FIV <sub>1</sub>                                   | 220 (75.6 %)   | 40 (13.7 %)       | 31 (10.7 %)    | 291 (76.0%)     | <b>0.000</b>    |
| FIV <sub>1</sub> /FIVC                             | 80 (76.2 %)    | 14 (14.3 %)       | 10 (9.5 %)     | 105 (27.4%)     | <b>0.000</b>    |
| FEV <sub>1</sub> /VC                               | 75 (72.1 %)    | 13 (12.5 %)       | 16 (15.4 %)    | 104 (27.2%)     | <b>0.000</b>    |
| FEV <sub>3</sub> /FVC                              | 2 (100 %)      | 0 (0 %)           | 0 (0 %)        | 2 (0.5%)        | <b>0.000</b>    |
| EVC                                                | 114 (80.9 %)   | 11 (7.8 %)        | 16 (11.3 %)    | 141 (36.8%)     | <b>0.000</b>    |
| IC                                                 | 84 (77.8 %)    | 11 (10.2 %)       | 13 (12.0 %)    | 108 (28.2%)     | <b>0.000</b>    |
| VC                                                 | 93 (82.3 %)    | 9 (8.0 %)         | 11 (9.7 %)     | 113 (29.5%)     | <b>0.000</b>    |
| ERV                                                | 215 (74.7 %)   | 39 (13.5 %)       | 34 (11.8 %)    | 289 (75.5%)     | <b>0.000</b>    |
| MVV                                                | 269 (73.9 %)   | 50 (13.7 %)       | 45 (12.4 %)    | 365 (95.3%)     | <b>0.000</b>    |

**Table S4.** Adjusted odds ratios (OR) of impaired lung function in relation to different BMI in children, bold numbers were statistically significant

| BMI types                | FEV <sub>6</sub> | FEV <sub>3</sub> | FEF <sub>25</sub> | FEF <sub>50</sub> | FIVC        | FIV <sub>1</sub> | FIV <sub>1</sub> /FIVC | FEV <sub>1</sub> /VC | EVC       | IC        | VC        | ERV       |
|--------------------------|------------------|------------------|-------------------|-------------------|-------------|------------------|------------------------|----------------------|-----------|-----------|-----------|-----------|
| Overweight (ref: Normal) |                  |                  |                   |                   |             |                  |                        |                      |           |           |           |           |
| OR                       | 3.85             | 4.70             | 3.78              | 2.58              | 5.64        | 27.29            | 2.71                   | 0.88                 | 0.88      | 0.66      | 1.46      | 0.63      |
| 95%CI                    | 1.18-12.56       | 1.34-16.51       | 1.08-13.19        | 0.82-8.07         | 1.31-24.28  | 5.82-127.87      | 0.65-11.28             | 0.25-3.15            | 0.28-2.73 | 0.20-2.16 | 0.43-4.91 | 0.14-2.85 |
| <i>P</i>                 | <b>0.03</b>      | <b>0.02</b>      | <b>0.04</b>       | 0.10              | <b>0.02</b> | <b>0.00</b>      | 0.17                   | 0.84                 | 0.82      | 0.49      | 0.55      | 0.55      |
| Obesity (ref: Normal)    |                  |                  |                   |                   |             |                  |                        |                      |           |           |           |           |
| OR                       | 0.93             | 2.72             | 1.12              | 1.06              | 1.46        | 4.68             | 2.55                   | 0.54                 | 0.48      | 0.46      | 0.48      | 0.38      |
| 95%CI                    | 0.22, 3.92       | 0.61-12.22       | 0.25-4.96         | 0.26-4.22         | 0.27-7.85   | 0.88-25.01       | 0.48-13.53             | 0.11-2.71            | 0.11-2.08 | 0.10-2.07 | 0.10-2.34 | 0.07-2.11 |
| <i>P</i>                 | 0.93             | 0.19             | 0.88              | 0.94              | 0.66        | 0.07             | 0.27                   | 0.46                 | 0.32      | 0.32      | 0.37      | 0.27      |

<sup>1</sup> Since no valid OR values were obtained for FET, FEV<sub>3</sub>/FVC and MVV, the ORs were not showed in the table.

Adjusted for gender, age, height, premature birth, parental education level, parental occupation, father smoking, other smoking, sleeping in own room, sleeping in own bed, household coal use, ventilation use when cooking, breast feeding, window opening and air condition use in different seasons, home renovation, presence of pets, presence of mold, mosquito coin use, air freshener use, air purifier use, kitchen type, parental bronchitis, intake of fruit, dairy, seafood and high-calorie food, doing physical exercise, ETS exposure and air exposure during commuting.

**Table S5.** Prevalence of reduced lung function in children with different potential influence factors

| Index                  | Renovation  |             |   | Preterm     |             |   | Air exposure |            |   |
|------------------------|-------------|-------------|---|-------------|-------------|---|--------------|------------|---|
|                        | Yes         | No          | P | Yes         | No          | P | Yes          | No         | P |
| FET                    | 71 (100.0%) | 301 (99.3%) | * | 33 (100.0%) | 333 (99.4%) |   | 293 (78.1%)  | 82 (21.9%) |   |
| FEV <sub>6</sub>       | 43 (60.6%)  | 129 (42.6%) |   | 20 (60.6%)  | 152 (45.4%) |   | 139 (79.9%)  | 35 (20.1%) |   |
| FEV <sub>3</sub>       | 28 (39.4%)  | 98 (32.3%)  |   | 15 (45.5%)  | 112 (33.4%) |   | 108 (84.4%)  | 20 (15.6%) | * |
| FEF <sub>25</sub>      | 49 (69.0%)  | 177 (58.4%) |   | 20 (60.6%)  | 202 (60.3%) |   | 176 (77.5%)  | 51 (22.5%) |   |
| FEF <sub>50</sub>      | 34 (47.9%)  | 149 (49.2%) |   | 19 (57.6%)  | 160 (47.8%) |   | 146 (79.8%)  | 37 (20.2%) |   |
| FIVC                   | 59 (83.1%)  | 248 (81.8%) |   | 30 (90.9%)  | 274 (81.8%) |   | 245 (79.0%)  | 65 (21.0%) |   |
| FIV <sub>1</sub>       | 58 (81.7%)  | 226 (74.6%) |   | 28 (84.8%)  | 253 (75.5%) |   | 228 (79.7%)  | 58 (20.3%) |   |
| FIV <sub>1</sub> /FIVC | 15 (21.1%)  | 89 (29.4%)  |   | 9 (27.3%)   | 90 (26.9%)  |   | 83 (79.8%)   | 21 (20.2%) |   |
| FEV <sub>1</sub> /VC   | 14 (19.7%)  | 88 (29.0%)  |   | 10 (30.3%)  | 93 (27.8%)  |   | 81 (78.6%)   | 22 (21.4%) |   |
| FEV <sub>3</sub> /FVC  | 0 (0.0%)    | 2 (0.7%)    |   | 0 (0.0%)    | 2 (0.65)    |   | 2 (100.0%)   | 0          |   |
| EVC                    | 31 (43.7%)  | 106 (35.0%) |   | 14 (42.4%)  | 122 (36.4%) |   | 113 (81.9%)  | 25 (18.1%) |   |
| IC                     | 23 (32.4%)  | 81 (26.7%)  |   | 11 (33.3%)  | 94 (28.1%)  |   | 78 (75.0%)   | 26 (25.0%) |   |
| VC                     | 29 (40.8%)  | 80 (26.4%)  | * | 13 (39.4%)  | 97 (29.0%)  |   | 91 (82.0%)   | 20 (18.0%) |   |
| ERV                    | 60 (84.5%)  | 224 (73.9%) |   | 25 (75.8%)  | 251 (74.9%) |   | 224 (78.9%)  | 60 (21.1%) |   |
| MVV                    | 69 (97.2%)  | 287 (94.7%) |   | 31 (93.9%)  | 320 (95.5%) |   | 280 (78.0%)  | 79 (22.0%) |   |

\* indicates statistically significant difference with a *P* value <0.05

**Table S6.** Adjusted OR (95%CI) for decreased lung function and opening window, using air condition in different seasons for children from urban and rural areas (n=383)

| Variables                   | FEV <sub>6</sub> | FEV <sub>3</sub> | FEF <sub>25</sub> | FEF <sub>50</sub> | FIVC            | FIV <sub>1</sub> | FIV <sub>1</sub> /FIVC | FEV <sub>1</sub> /VC | EVC   | IC             | VC    | ERV            | MVV |
|-----------------------------|------------------|------------------|-------------------|-------------------|-----------------|------------------|------------------------|----------------------|-------|----------------|-------|----------------|-----|
| Window opening time         |                  |                  |                   |                   |                 |                  |                        |                      |       |                |       |                |     |
| Summer (ref: <14 hours/day) | 0.735            | 1.542            | <b>0.375 *</b>    | 0.639             | 0.817           | 0.725            | 0.829                  | 0.724                | 0.610 | 0.690          | 0.415 | 2.374          | /   |
| Autumn (ref: <14 hours/day) | 3.043            | 1.979            | 1.347             | 0.888             | 0.817           | 1.168            | 0.407                  | 4.088                | 2.588 | <b>5.894 *</b> | 4.146 | 1.193          | /   |
| Winter (ref: <9 hours/day)  | 0.556            | 1.193            | 0.622             | <b>0.359 *</b>    | 1.671           | 0.716            | 1.613                  | 0.608                | 1.059 | 1.090          | 0.861 | 1.952          | /   |
| Air conditioner use time    |                  |                  |                   |                   |                 |                  |                        |                      |       |                |       |                |     |
| Summer (ref: <8 hours/day)  | 0.600            | 0.558            | 2.047             | 1.261             | 0.888           | 0.473            | 0.681                  | 1.057                | 0.788 | 1.558          | 0.868 | 1.511          | /   |
| Autumn (ref: <8 hours/day)  | 0.132            | 0.000            | 0.030             | 2.595             | <b>0.010 **</b> | 0.129            | 5.429                  | 1.695                | 0.142 | 4.169          | 0.125 | <b>0.051 *</b> | /   |

**Table S7.** Rate of preterm birth, household renovation, doing physical exercise of children among mother groups being different occupations

|            | Being white collar                         | Being blue collar | Without stable income | <i>p</i> |
|------------|--------------------------------------------|-------------------|-----------------------|----------|
|            | Household renovation                       |                   |                       | 0.741    |
| No         | 159 (57.4%)                                | 70 (25.3%)        | 48 (17.3%)            |          |
| <b>Yes</b> | <b>33 (52.4%)</b>                          | <b>17 (27.0)</b>  | <b>13 (20.6%)</b>     |          |
|            | Preterm birth                              |                   |                       | 0.885    |
| No         | 172 (56.2%)                                | 79 (25.8%)        | 55 (18.0%)            |          |
| <b>Yes</b> | <b>17 (51.5%)</b>                          | <b>9 (27.3%)</b>  | <b>7 (21.2%)</b>      |          |
|            | Doing physical exercise ≥30 min/day        |                   |                       | 0.118    |
| No         | 109 (55.6%)                                | 56 (28.6%)        | 31 (15.8%)            |          |
| <b>Yes</b> | <b>56 (57.1%)</b>                          | <b>19 (19.4%)</b> | <b>23 (23.5%)</b>     |          |
|            | Opening window ≥9 hours/day in winter      |                   |                       | 0.008    |
| <b>No</b>  | <b>104 (49.5%)</b>                         | <b>65 (31.0%)</b> | <b>41 (19.5%)</b>     |          |
| Yes        | 89 (65.9%)                                 | 25 (18.5%)        | 21 (15.6%)            |          |
|            | Opening window ≥14 hours/day in summer     |                   |                       | 0.779    |
| <b>No</b>  | <b>119 (56.1%)</b>                         | <b>53 (25.0%)</b> | <b>40 (18.9%)</b>     |          |
| Yes        | 74 (55.6%)                                 | 37 (27.8%)        | 22 (16.5%)            |          |
|            | Opening window ≥14 hours/day in autumn     |                   |                       | 0.226    |
| No         | 117 (54.2%)                                | 63 (29.2%)        | 36 (16.7%)            |          |
| <b>Yes</b> | <b>76 (58.9%)</b>                          | <b>27 (20.9%)</b> | <b>26 (20.2%)</b>     |          |
|            | Using air condition ≥8 hours/day in summer |                   |                       | 0.001    |
| No         | 75 (53.6%)                                 | 49 (35.0%)        | 16 (11.4%)            |          |
| <b>Yes</b> | <b>118 (57.6%)</b>                         | <b>41 (20.0%)</b> | <b>46 (22.4%)</b>     |          |

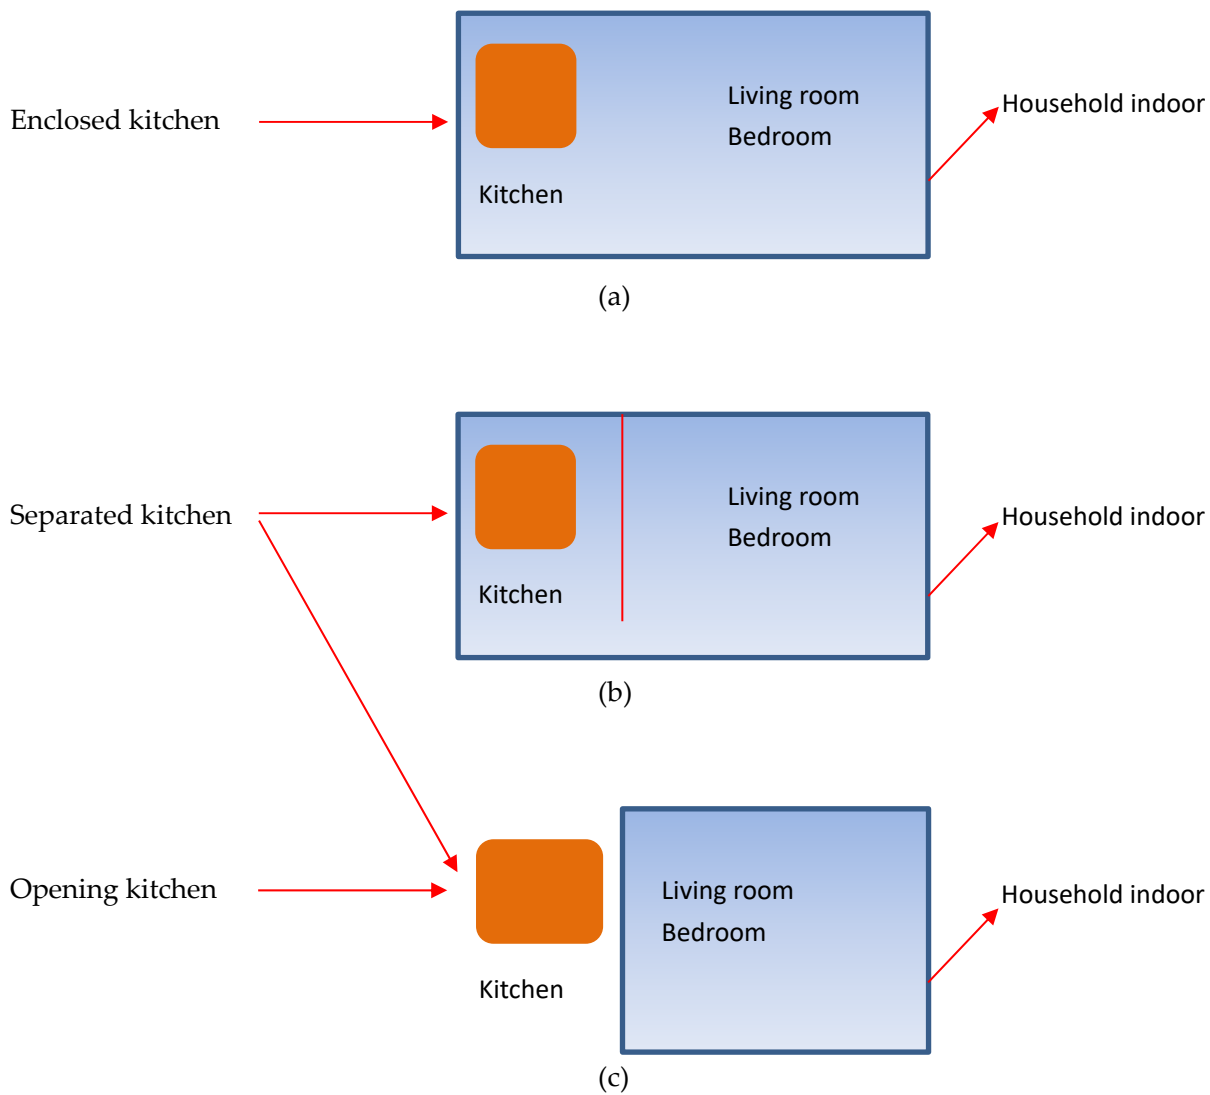

**Figure S1.** (a): Enclosed kitchen, represents inside or opening kitchen, which is defined as a kitchen that was not isolated to the living room or bedroom with a door or other device; (b): Separated kitchen, represents the kitchen which is isolated to the living room or bedroom with a door or other device, and also represents the kitchen which is separate outside the house (i.e., the kitchen of kind of c); (c): Outdoor kitchen, represents to the kitchen which is separate outside the house

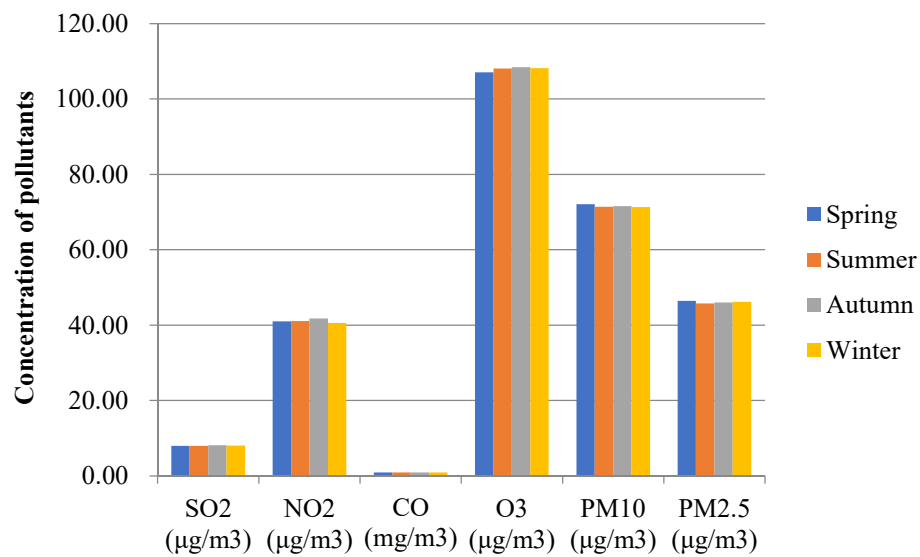

**Figure S2.** Concentrations of six main pollutants in different seasons of Wuhan, China.
